# Supplementary material for: Effect of changes in green spaces on mental health in older adults: a fixed effects analysis
Source: J Epidemiol Community Health. 2019 Oct 19;74(1):48–56. doi: 10.1136/jech-2019-212704 (PMC6929698; doi:10.1136/jech-2019-212704)
Supplement: Supplementary data [file jech-2019-212704supp001.pdf]

## APPENDIX 1: MORE INFORMATION ON THE BBG DATABASE AND LAND USE CLASSIFICATION

The TOP10NL dataset is the official, national topographical representation of the Netherlands and is maintained by the Dutch mapping agency 'Kadaster'. Statistics Netherlands converts this topographical data to land use data and publishes the resulting files as open source GIS data. The 'Bestand Bodemgebruik' (BBG) is the collection of these files. The BBG dataset is generally updated every two to four years depending on funding sources and research needs. The most recent dataset is distributed by Statistics Netherlands and is repositied in the Dutch National Georegister. Historical files are distributed by the Netherlands institute for permanent access to digital research resources. These files are available through their Data Archiving and Networked Services (DANS). This platform aims to make digital research data and related outputs findable, accessible, interoperable and reusable. All historical BBG files are available through this platform free of charge.

**Table 1: Green space classifications based on the land use classification of the BBG dataset**

| Green space categories                  | Corresponding BBG classifications                                                                                                          |
|-----------------------------------------|--------------------------------------------------------------------------------------------------------------------------------------------|
| 1. Green spaces                         | Parks<br>Allotment gardens<br>Dry open terrain<br>Recreational Areas                                                                       |
| 2. Green and blue spaces                | Parks<br>Allotment gardens<br>Dry open terrain<br>Recreational Areas<br><br>Lakes<br>Estuaries<br>Rivers<br>Backwaters<br>Wet open terrain |
| 3. Green and agricultural spaces        | Parks<br>Allotment gardens<br>Dry open terrain<br>Recreational Areas<br><br>Agricultural areas                                             |
| 4. Green, blue, and agricultural spaces | Parks<br>Allotment gardens<br>Dry open terrain<br>Recreational Areas                                                                       |

|  |                                                                                          |
|--|------------------------------------------------------------------------------------------|
|  | Lakes<br>Estuaries<br>Rivers<br>Backwaters<br>Wet open terrain<br><br>Agricultural areas |
|--|------------------------------------------------------------------------------------------|

**Table 2: Complete land use classification of the BBG dataset as translated by the authors**

| Main Group                     | Category | Lower Bounds (hectares) | Description                                    |
|--------------------------------|----------|-------------------------|------------------------------------------------|
| 1. Traffic areas               |          |                         |                                                |
|                                | 10       | None                    | Railway areas                                  |
|                                | 11       | None                    | Road traffic areas                             |
|                                | 12       | 1                       | Airports                                       |
| 2. Built environment           |          |                         |                                                |
|                                | 20       | 1                       | Residential areas                              |
|                                | 21       | 1                       | Retail areas                                   |
|                                | 22       | 1                       | Public facility areas                          |
|                                | 23       | 1                       | Social-cultural facility areas                 |
|                                | 24       | 1                       | Business areas                                 |
| 3. Semi-built areas            |          |                         |                                                |
|                                | 30       | 1                       | Dumping grounds                                |
|                                | 31       | 0.1                     | Junkyards                                      |
|                                | 32       | 0.1                     | Cemeteries                                     |
|                                | 33       | 0.5                     | Quarries                                       |
|                                | 34       | 1                       | Building sites                                 |
|                                | 35       | 1                       | Other                                          |
| 4. Recreational areas          |          |                         |                                                |
|                                | 40       | 1                       | Parks                                          |
|                                | 41       | 0.5                     | Sports areas                                   |
|                                | 42       | 0.1                     | Allotment gardens                              |
|                                | 43       | 1                       | Recreational areas                             |
|                                | 44       | 1                       | Extended stay recreational areas               |
| 5. Agricultural areas          |          |                         |                                                |
|                                | 50       | 1                       | Greenhouses                                    |
|                                | 51       | 1                       | General agricultural areas                     |
| 6. Forests and natural terrain |          |                         |                                                |
|                                | 60       | 1                       | Forests                                        |
|                                | 61       | 1                       | Open terrain (dry)                             |
|                                | 62       | 1                       | Open terrein (mixed)                           |
| 7. Backwaters                  |          |                         |                                                |
|                                | 70       | -                       | Lakes: IJsselmeer and Markermeer               |
|                                | 71       | -                       | Closed estuaries                               |
|                                | 72       | -                       | Rivers: Rhine and Maas                         |
|                                | 73       | -                       | Border lakes                                   |
|                                | 74       | 1                       | Water reservoirs                               |
|                                | 75       | 1                       | Recreational backwaters                        |
|                                | 76       | 1                       | Water used for mineral extraction              |
|                                | 77       | 1                       | Sludge fields                                  |
|                                | 78       | 1                       | Other backwaters                               |
| 8. Open waters                 |          |                         |                                                |
|                                | 80       | -                       | Specific open waters: Waddenzee, Eems, Dollard |
|                                | 81       | -                       | Specific open waters: Oosterschelde            |

|            |    |   |                                     |
|------------|----|---|-------------------------------------|
|            | 82 | - | Specific open waters: Westerschelde |
|            | 83 | - | North Sea                           |
| 9. Borders |    |   |                                     |
|            | 90 | - | Country borders                     |
